## KCl TRANSPORT ACROSS AN INSECT EPITHELIUM: CHARACTERIZATION OF K-STIMULATED Cl ABSORPTION AND ACTIVE K TRANSPORT

By J. W. HANRAHAN\* AND J. E. PHILLIPS

Department of Zoology, University of British Columbia, Vancouver, B.C.  
Canada V6T 2A9

Accepted 29 February 1984

### SUMMARY

The kinetics of  $^{36}\text{Cl}$  fluxes across cAMP-stimulated, short-circuited locust rectum were studied. Raising external  $\text{K}^+$  from 0 to 100 mM increased both  $K_t$  and  $V_{\max}$  for net Cl transport ( $J_{\text{net}}^{\text{Cl}}$ ) by four- to six-fold. Hill plots of  $J_{\text{net}}^{\text{Cl}}$  indicated non-cooperative Cl interactions. The sequence for cation stimulation of  $J_{\text{net}}^{\text{Cl}}$  was  $\text{K} > \text{Rb} > \text{Cs} > \text{Na} > \text{NH}_4$ . Low levels of K were stimulatory only when added to the mucosal side. Cyclic AMP (cAMP) caused a small active absorption of K, although this was minor compared to the four-fold increase in transepithelial K diffusion ( $P_K$ ). Neither cAMP stimulation of  $J_{\text{net}}^{\text{K}}$  nor of  $P_K$  was sensitive to Cl removal, suggesting that K-stimulated Cl absorption and K transport are not mediated by the same co-transport mechanism. Potassium is the counter-ion for electrogenic Cl transport because  $J_{\text{net}}^{\text{K}}$  was less than 10% of the  $J_{\text{net}}^{\text{Cl}}$  during cAMP exposure under  $I_{sc}$  conditions, but  $J_{\text{net}}^{\text{K}}$  equalled  $J_{\text{net}}^{\text{Cl}}$  at open-circuit.

### INTRODUCTION

The rectum of the desert locust *Schistocerca gregaria* actively absorbs water and solutes from the lumen of the hindgut (Phillips, 1964*a,b*). Most of the fluid reaching the rectal lumen originates at the Malpighian tubules, which secrete an isosmotic 'primary urine' which typically contains much higher levels of K (140 mM) and considerably less Na (20–47 mM) than are present in the haemolymph (Phillips, 1964*a,b,c*, 1981; Hanrahan, 1982).

We found evidence that Cl is actively transported across this epithelium by an unusual, K-stimulated mechanism (Hanrahan & Phillips, 1982). The purpose of the present work is to examine the relationship between K and Cl transport in more detail; specifically, (i) we use steady-state tracer fluxes to establish whether K alters the maximal rate of transport ( $J_{\max}^{\text{Cl}}$ ), the apparent affinity of the transport mechanism for Cl ( $K_t^{\text{Cl}}$ ), or both; (ii) we quantify the K requirements of Cl transport and determine the sidedness and cation selectivity of the stimulation and (iii) we test whether the active components of net Cl and K absorptions are interdependent by measuring

\*Present address: Department of Physiology, Yale University School of Medicine, 333 Cedar St, New Haven, Conn. 06510, U.S.A.

Key words: Chloride absorption, K-stimulated Cl transport, cAMP, electrogenic chloride transport.

the effects of cAMP and Cl omission on transepithelial  $^{42}\text{K}$  fluxes. The results indicate that only low concentrations of K are required, that stimulation involves increases in  $K_t^{\text{Cl}}$  and  $J_{\text{max}}^{\text{Cl}}$ , and that K acts only from the mucosal side. There is a small active component of K absorption, but most K transport is passive and electrically coupled to Cl absorption. Some of these conclusions have been reported in preliminary form as symposia proceedings (Hanrahan & Phillips, 1980a,b, 1982, 1983).

#### MATERIALS AND METHODS

Adult female locusts, *Schistocerca gregaria*, were obtained from a colony maintained at U.B.C. The dissection and chambers were those of Williams, Phillips, Prince & Meredith (1978). The rectum was cut longitudinally to produce a sheet and attached across a collar-shaped opening with fine tungsten pins and a rubber 'O'-ring. Five ml of solution were placed in both half-chambers and stirred with 95 %  $\text{O}_2$ /5 %  $\text{CO}_2$  when  $\text{HCO}_3^-$  was present, or with 100 %  $\text{O}_2$  without  $\text{HCO}_3^-$ . Normal saline contained (mequiv  $\text{l}^{-1}$ ): 110 Na, 10 K, 20 Mg, 10 Ca, 110 Cl, 10  $\text{HCO}_3^-$ , 10 glucose and 100 sucrose. Nominally Cl-free saline was prepared by replacing all Cl with methylsulphate. K-free saline was prepared by isosmolal replacement of K with sucrose. All salines contained the following amino acids as substrates (mmol  $\text{l}^{-1}$ ): 2.9 alanine, 1.0 arginine, 1.3 asparagine, 5.0 glutamine, 11.4 glycine, 1.4 histidine, 1.4 lysine, 13.1 proline, 1.5 serine, 1.9 tryptophan, 1.8 valine. Saline pH was 7.2 in  $\text{HCO}_3^-$ -containing salines and 7.0–7.4 under  $\text{HCO}_3^-$ -free conditions. Experiments were performed at 22 °C.

The voltage clamp used in these studies has been described in detail elsewhere (Hanrahan, 1982; Hanrahan, Meredith, Phillips & Brandys, 1983). Short-circuit current ( $I_{\text{sc}}$ ) and transepithelial potential ( $V_t$ ) were recorded on a strip chart recorder. Corrections were made automatically for asymmetries between the voltage-sensing KCl agar bridges and for resistance of the bathing saline by the method of Rothe, Quay & Armstrong (1969). These corrections were especially important during large increases in [NaCl] and [K methylsulphate].

#### Kinetics of transepithelial $^{36}\text{Cl}$ fluxes

Tissues were equilibrated in normal saline under  $I_{\text{sc}}$  conditions for 3 h, and then the external medium was replaced bilaterally with Cl-free saline (methylsulphate substitution).  $I_{\text{sc}}$  was near zero under these conditions. Approximately 0.5 h later, the chambers were rinsed three times with fresh Cl-free saline and cAMP was added to the serosal side to a final concentration of 1 mM. Small aliquots of 2 M-NaCl were then added to both sides in order to raise [Cl] stepwise from 0 to 2, 4, 10, 40 and 114 mM.  $^{36}\text{Cl}$  fluxes were measured during each step as described previously (Williams *et al.* 1978; Hanrahan, Phillips & Steeves, 1983).  $^{36}\text{Cl}$  (New England Nuclear, carrier-free, 5.9 mCi  $\text{g}^{-1}$  Cl) was added as  $\text{H}^{36}\text{Cl}$  to the 'hot' side in amounts that were too small to alter [Cl] significantly. One ml samples were taken from the 'cold' side at 15-min intervals and replaced with fresh saline. Samples were placed in 10 ml of scintillation fluid (ACS Amersham Corp., Oakville, Ontario) and were counted at constant quench using a scintillation counter (Isocap, Nuclear Chicago). Appropriate corrections were made for dilution during sampling. No correction was necessary for tracer backflow.

Since  $^{36}\text{Cl}$  activity on the cold side reached only 0.5 % of that on the hot side.

Cyclic AMP was present when measuring transepithelial flux kinetics in order to stimulate active Cl transport: cAMP was equally effective in stimulating Cl transport when added immediately after dissection or after equilibration *in vitro* for several hours in normal saline. After switching to nominally Cl-free solution (cAMP still present),  $J_{ms}^{\text{Cl}}$  attained a new steady-state value 15 min after each step increase in [Cl]. Data from the second flux period were used in all calculations. The dependence of  $J_{ms}^{\text{Cl}}$  on [Cl] was determined in salines containing 0, 10 and 100 mM-K in separate experiments: [K] was adjusted with K methylsulphate.

### Measurement of K-dependence of Cl transport

The increase in  $I_{sc}$  was used as a measure of  $J_{net}^{\text{Cl}}$  while adding K-methylsulphate bilaterally. The equivalence of  $I_{sc}$  and  $J_{net}^{\text{Cl}}$  during cAMP-stimulation has been established over the range 0–140 mM-K (see Table 2 and Fig. 1). In other words, elevating [K] does not cause electrogenic transport of ions other than Cl.

After mounting and short-circuiting the tissues, the chambers were rinsed repeatedly in K-free saline for 3–4 h. Cyclic AMP was added to the serosal side, causing  $I_{sc}$  to increase to a new steady-state level within 1 h. Aliquots of K-methylsulphate were then added to both sides at 0.5 h intervals to yield sequential concentrations of 0, 2, 4, 10, 40, 100, 140 and 200 mM-K. An identical protocol was followed during control experiments, except that Na-methylsulphate was added. Transepithelial potential and resistance were measured at 15 min intervals.

### Transepithelial $^{42}\text{K}$ fluxes

$^{42}\text{K}$  (New England Nuclear Corp., 0.13–0.15 Ci g $^{-1}$ ) was added as  $^{42}\text{KCl}$  to normal saline or as  $^{42}\text{K}_2\text{CO}_3$  to Cl-free saline. Samples were taken at 15 min intervals and counted using an automatic gamma counter (1085, Nuclear Chicago). Initial radioactivity of the labelled side served as a reference in order to correct for tracer decay during experiments (total experimental and counting time = 11 h).

### Calculations and statistics

In order to compare the instantaneous  $I_{sc}$  with tracer fluxes measured at intervals,  $I_{sc}$  recordings were integrated using a planimeter (model L30M, Lasico, Los Angeles, California). Values are means  $\pm$  standard errors unless stated otherwise;  $N$  = number of recta. Where appropriate, significant difference were determined using paired or unpaired  $t$ -tests.

Unless otherwise stated, net fluxes were calculated as the difference between mean unidirectional fluxes on different preparations, and standard deviation of net flux ( $S_{net}$ ) was calculated from the variances of the unidirectional fluxes ( $S_{ms}$ ,  $S_{sm}$ ) by

$$S_{net} = \sqrt{\frac{S_{ms}^2}{n_{ms}} + \frac{S_{sm}^2}{n_{sm}}}$$

As a test of significance of net flux, we used the cautious method of showing non-overlap of confidence limits for forward and back fluxes.

When kinetics of  $J_{ms}^{\text{Cl}}$  were studied on individual rectal preparations,  $J_{net}^{\text{Cl}}$  was

estimated by subtracting the mean backflux ( $J_{sm}^{Cl}$ ) for other preparations at the same  $[Cl]$ . This was justified because  $J_{sm}^{Cl}$  was very much smaller and very much less variable than  $J_{ms}^{Cl}$  (i.e.  $J_{sm}^{Cl}$  contributed on average only 5 %, maximum 17 %, of the total variance in net flux). Calculating the kinetic parameters,  $K_t$  and  $J_{max}$ , for Cl transport on individual rectal preparations in this way (i.e. ignoring the small variance in  $J_{sm}$ ) gave an indication of kinetic variation that could not have been obtained from a single Woolf plot using  $J_{net}^{Cl}$  calculated from mean  $J_{ms}^{Cl}$  and  $J_{sm}^{Cl}$  values.

## RESULTS

### *Kinetics of Cl absorption*

$I_{sc}$  and  $J_{ms}^{Cl}$  increased hyperbolically as  $[Cl]$  was elevated on both sides of the rectum (Fig. 1). In contrast,  $J_{sm}^{Cl}$  increased linearly and showed no evidence of saturation. As expected,  $J_{net}^{Cl}$  and  $I_{sc}$  were nearly identical at all Cl concentrations.

Fig. 2 shows that forward fluxes of  $^{36}Cl$  were significantly lower in K-free saline ( $P < 0.01$ ) and higher in 100 mM-K saline ( $P < 0.01$ ) when compared to normal saline (10 mM-K). Since  $J_{sm}^{Cl}$  is identical when tissues are bathed in saline containing 1 or 140 mM-K (Hanrahan, 1982) and increases linearly with chloride concentration

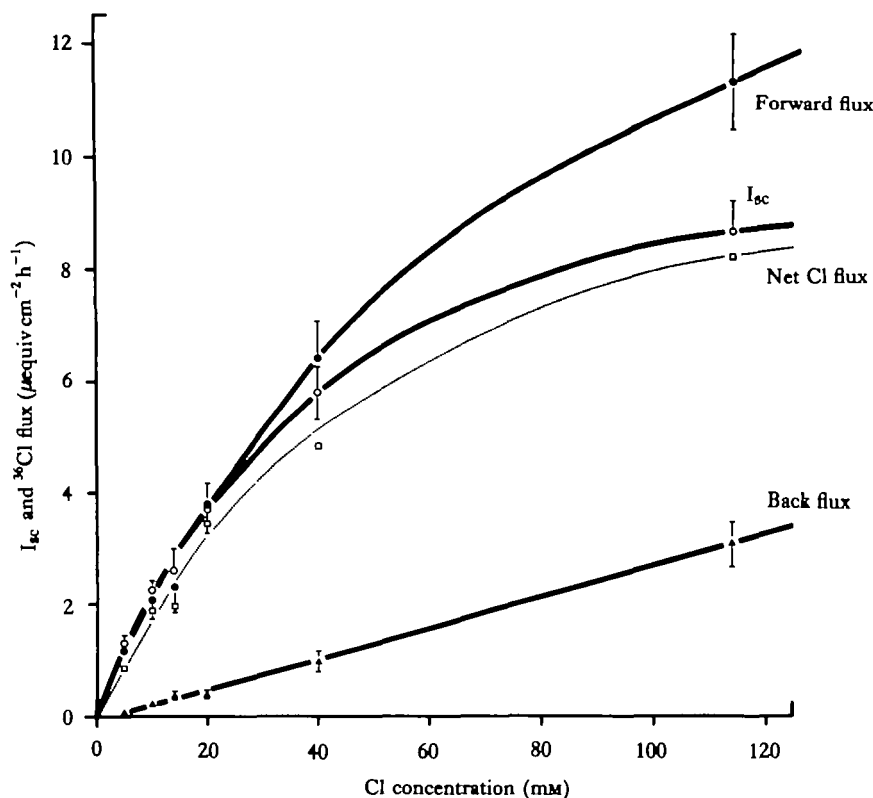

Fig. 1. The dependence of Cl fluxes and  $I_{sc}$  on  $[Cl]$  with cAMP present. Unidirectional Cl fluxes from (●) mucosa to serosa and (▲) serosa to mucosa, (□) calculated net Cl flux and (○) short-circuit current. Means  $\pm$  s.e.;  $N = 10$ .

$\frac{J_{\text{net}}^{\text{Cl}}}{J_{\text{ms}}^{\text{Cl}}} = 0.998$ ; Fig. 1),  $J_{\text{sm}}^{\text{Cl}}$  presumably occurs by passive diffusion.  $J_{\text{net}}^{\text{Cl}}$  was calculated as  $J_{\text{ms}}^{\text{Cl}} - J_{\text{sm}}^{\text{Cl}}$  at each  $[K]$  using the  $J_{\text{sm}}^{\text{Cl}}$  measured in normal saline. Data from individual preparations were fitted by linear regression to the Michaelis-Menten equation using the Woolf transformation (Haldane, 1957), because this method is considered to be least sensitive to measurement errors (Blünck & Mommsen, 1978). Weighting procedures were not applied because the type of error (absolute *vs* relative) was unknown. Woolf plots were linear, as indicated in Fig. 3. For ten preparations used to calculate  $K_t$  and  $J_{\text{max}}^{\text{Cl}}$  at 10 mM-K,  $98.2 \pm 0.65\%$  of the variation in  $[Cl]/J_{\text{net}}^{\text{Cl}}$  was attributable to this linear relationship with  $[Cl]$ .

As shown in Table 1, both  $K_t$  and  $J_{\text{net}}^{\text{Cl}}$  increased significantly ( $P < 0.001$ ) as the  $[K]$  was raised from 0 to 100 mM. Thus the stimulation of Cl absorption by K did not result from a simple increase in affinity of the transporter for Cl.

Cooperative interactions between Cl-binding sites have been demonstrated for transporting epithelia of prawn intestine (Ahearn, 1978) and the mosquito posterior rectum (Bradley & Phillips, 1977; Phillips, Bradley & Maddrell, 1978). Fig. 4 shows that Hill plots of mean  $J_{\text{net}}^{\text{Cl}}$  had slopes near one at all concentrations of K (e.g. 1.09 at 0 mM, 0.91 at 10 mM, and 0.99 at 100 mM-K). Using the slope as a measure of the Hill constant or number of interacting sites (Segel, 1975), these results suggest that

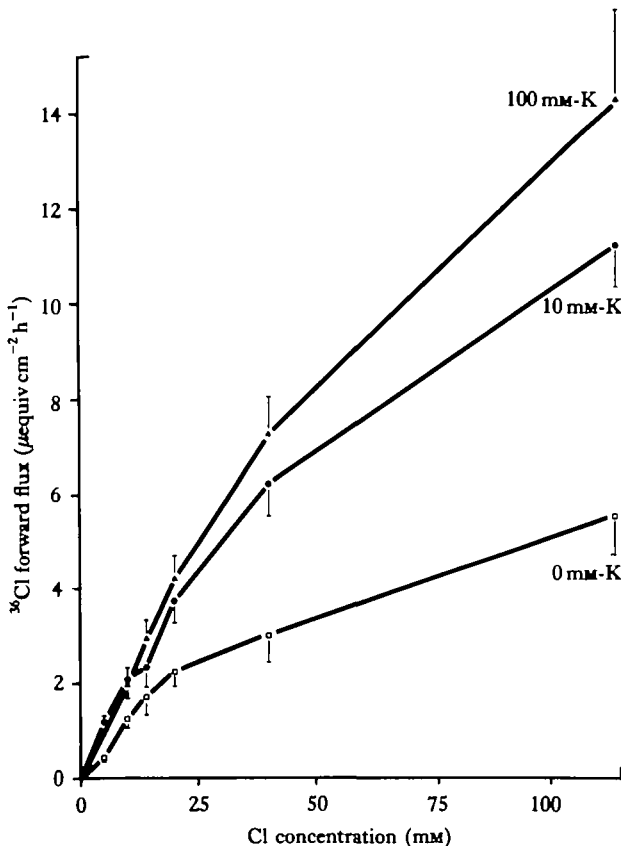

Fig. 2. The influence of external  $[K]$  on the relationship between  $J_{\text{net}}^{\text{Cl}}$  and  $[Cl]$  of the saline. Tissues were stimulated by 1 mM-cAMP on the serosal side under  $I_{sc}$  conditions. Bilateral  $[K]$  was adjusted from 0 mM to 10 mM or 100 mM by adding K-methylsulphate. Means  $\pm$  s.e.;  $N = 6-10$ .

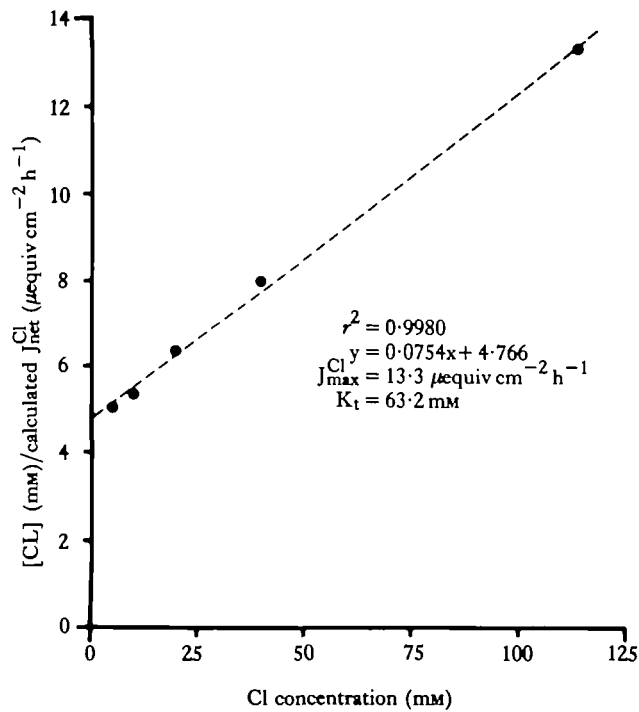

Fig. 3. Representative plot of data used in calculating kinetic constants.  $J_{net}^{Cl}$  was obtained at each [Cl] by subtracting mean  $J_{sm}^{Cl}$  (six recta) from individually measured forward fluxes ( $J_{ms}^{Cl}$ ) measured under  $I_{sc}$  condition. Data were fitted by standard linear regression to the Michaelis-Menten equation using the Woolf transformation  $[Cl]/J_{net}^{Cl} = K_t/J_{max}^{Cl} + [Cl]/J_{max}^{Cl}$ .

Table 1. *Effects of external K on the kinetics of steady-state  $^{36}\text{Cl}$  fluxes across cAMP-stimulated recta under  $I_{sc}$  conditions*

| K concentration (mM) | $K_t$ [Cl] (mM) | $J_{max}^{Cl}$ ( $\mu\text{equiv cm}^{-2} \text{h}^{-1}$ ) | (N) |
|----------------------|-----------------|------------------------------------------------------------|-----|
| 0                    | $22.7 \pm 4.0$  | $3.5 \pm 0.7$                                              | 6   |
| 10                   | $60.2 \pm 8.7$  | $14.9 \pm 1.9$                                             | 10  |
| 100                  | $99.6 \pm 13.4$ | $23.1 \pm 5.3$                                             | 7   |

Means  $\pm$  s.e.; calculated using Woolf transformation as described in text.

the rate-limiting step in transrectal Cl absorption does not involve cooperative interactions between Cl-binding sites.

*$I_{sc}$  and  $^{36}\text{Cl}$  fluxes in 'high K' saline*

All previous studies of transport across insect hindgut have employed high-Na, low-K salines, even though the rectum normally contains a K-rich, low-Na fluid secreted by the Malpighian tubules. Therefore, transepithelial  $^{36}\text{Cl}$  fluxes were measured in saline containing 140 mM-K (i) to determine if  $I_{sc}$  still equals  $J_{net}^{Cl}$ , as it does in normal saline, (ii) to measure the possible effects of high [K] on  $J_{sm}^{Cl}$  and (iii) to examine whether responsiveness to cAMP is altered by this physiological level of K.

Both  $J_{ms}^{Cl}$  and  $I_{sc}$  increased during exposure to 1 mM-cAMP in high K saline (Tab

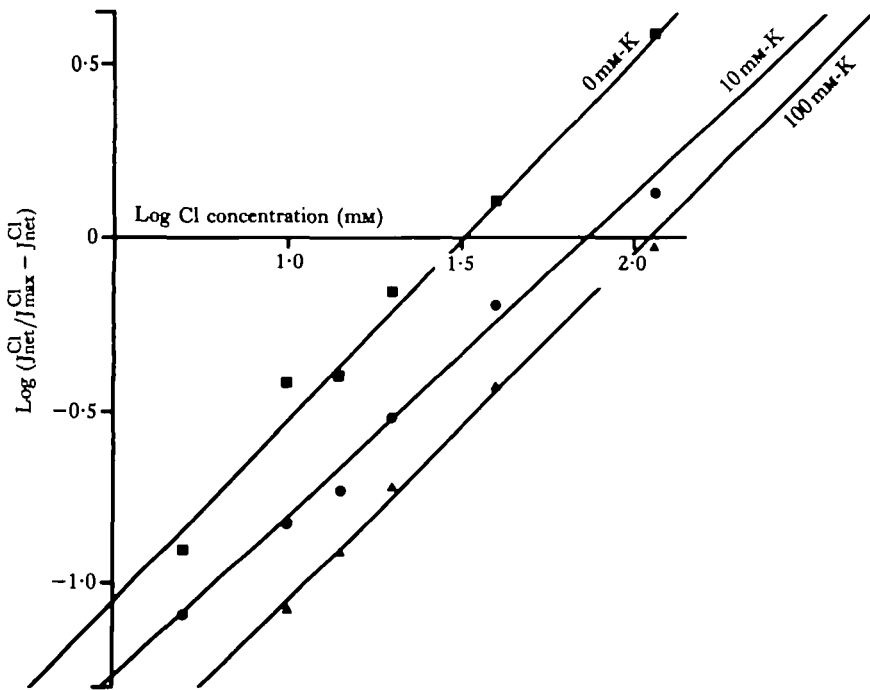

Fig. 4. Hill plots of  $J_{\text{net}}^{\text{Cl}}$  at external  $[K] = 0, 10, 100$  mM. Net fluxes were calculated under  $I_{\text{sc}}$  conditions in the presence of 1 mM-cAMP on the serosal side, and plotted according to the Hill equation:  $\log [J_{\text{net}}^{\text{Cl}} / (J_{\text{max}}^{\text{Cl}} - J_{\text{net}}^{\text{Cl}})] = n \log [Cl] - \log K_t$ . Symbols are mean values calculated as described in text.

2). Surprisingly,  $R_t$  was  $40 \Omega \text{cm}^2$  *higher* during cAMP stimulation in high-K saline (140 mM) than in normal saline (10 mM-K) during cAMP stimulation (Hanrahan, 1982;  $P < 0.01$ ). As discussed in a later section, this high resistance is explained by the fact that K permeability of the epithelium varies inversely with saline  $[K]$ .

It is of interest to compare  $J_{\text{sm}}^{\text{Cl}}$  in high-K saline with  $J_{\text{sm}}^{\text{Cl}}$  in normal saline. From Fig. 1,  $J_{\text{sm}}^{\text{Cl}} = 1.3 \mu\text{equiv cm}^{-2} \text{h}^{-1}$  at  $[Cl] = 50$  mM,  $[K] = 10$  mM, in close agreement with  $J_{\text{sm}}^{\text{Cl}}$  observed when  $[K] = 140$  mM and  $[Cl] = 50$  mM ( $0.9\text{--}1.3 \mu\text{equiv cm}^{-2} \text{h}^{-1}$ ; Table 2). Chloride permeability ( $P_{\text{Cl}}$ ) is apparently not affected by  $[K]$ , at least over this range. In summary, after stimulation  $\Delta I_{\text{sc}}$  equals  $J_{\text{net}}^{\text{Cl}}$  when external  $[K] = 0$  mM (Hanrahan, 1982), 10 mM (Fig. 1) or 140 mM (Table 2). Active Cl transport is the major electrogenic process in stimulated locust rectum under all conditions studied.

#### Apparent K activation constant ( $K_a$ ) of Cl transport

Since  $\Delta I_{\text{sc}}$  is a good measure of active Cl transport regardless of saline  $[K]$ , the apparent  $K_a$  of K stimulation was estimated from the effects of K addition on  $\Delta I_{\text{sc}}$  in the presence of cAMP.

Fig. 5A shows that addition of cAMP alone caused  $I_{\text{sc}}$  to increase from  $0.86 \mu\text{equiv cm}^{-2} \text{h}^{-1}$  to  $1.57 \mu\text{equiv cm}^{-2} \text{h}^{-1}$ , in close agreement with  $J_{\text{net}}^{\text{Cl}}$  obtained in  $\text{K}^+$ -free saline. When external  $[K]$  was then elevated from 0 mM to 100 mM by stepwise

Table 2. *Effects of cAMP on  $^{36}\text{Cl}$  fluxes and electrical parameters in high-K (140 mM) saline*

|                        | $I_{sc}$<br>( $\mu\text{equiv cm}^{-2} \text{ h}^{-1}$ ) | $J_{ms}^{Cl}$<br>( $\mu\text{equiv cm}^{-2} \text{ h}^{-1}$ ) | $J_{sm}^{Cl}$<br>( $\mu\text{equiv cm}^{-2} \text{ h}^{-1}$ ) | $J_{net}^{Cl}$<br>( $\mu\text{equiv cm}^{-2} \text{ h}^{-1}$ ) | $V_t$<br>(mV)    | $R_t$<br>( $\Omega\text{cm}^2$ ) |
|------------------------|----------------------------------------------------------|---------------------------------------------------------------|---------------------------------------------------------------|----------------------------------------------------------------|------------------|----------------------------------|
| Control (unstimulated) | $2.59 \pm 0.36$                                          | $1.55 \pm 0.20$                                               | $0.85 \pm 0.07$                                               | $0.70 \pm 0.21$                                                | $14.00 \pm 2.08$ | $206.5 \pm 7.60$                 |
| 1 mM-cAMP (90 min)     | $8.51 \pm 0.96$                                          | $9.82 \pm 0.85$                                               | $0.93 \pm 0.19$                                               | $8.89 \pm 0.87$                                                | $31.80 \pm 3.10$ | $150.50 \pm 12.40$               |
| $\Delta$               | $5.92 \pm 0.76$                                          | $8.27 \pm 0.87$                                               | $0.083 \pm 0.24$                                              | 8.19                                                           | $15.31 \pm 3.09$ | $56.04 \pm 34.30$                |
| $P$                    | $<0.01$                                                  | $<0.01$                                                       | $>0.2$                                                        | $<0.05$                                                        | $<0.01$          | $<0.01$                          |

All values are mean  $\pm$  s.e., except  $J_{net}^{Cl}$ , which is the calculated difference between mean  $J_{ms}^{Cl}$  and  $J_{sm}^{Cl}$   $\pm$  the standard deviation of this value (see Methods). Paired  $t$ -tests were used to obtain  $P$  values for all  $\Delta$  values except  $\Delta J_{net}^{Cl}$ , where significance of  $\Delta$  was inferred by setting confidence limits around  $J_{net}^{Cl}$  before and after cAMP addition.

$N = 12$  recta for  $I_{sc}$ ,  $V_t$ ;  $N = 6$  recta for  $J_{ms}^{Cl}$ ,  $J_{sm}^{Cl}$ .



Addition of  $\text{KCH}_3\text{SO}_4$  to both sides,  $I_{\text{sc}}$  increased similarly to a maximum rate of  $12.68 \mu\text{equiv cm}^{-2} \text{h}^{-1}$ . Above  $100 \text{ mM-K}$ ,  $I_{\text{sc}}$  decreased reversibly (Fig. 5A).  $V_t$  increased from  $7.2$  to  $16.8 \text{ mV}$  when  $1 \text{ mM-cAMP}$  was added to K-free saline (data not shown).  $R_t$  remained constant when  $[\text{K}]$  was raised from  $10$  to  $200 \text{ mM}$  (Fig. 5B), a surprising result considering the normally high K permeability of this epithelium. To control for possible artefacts which might result from increases in osmotic pressure

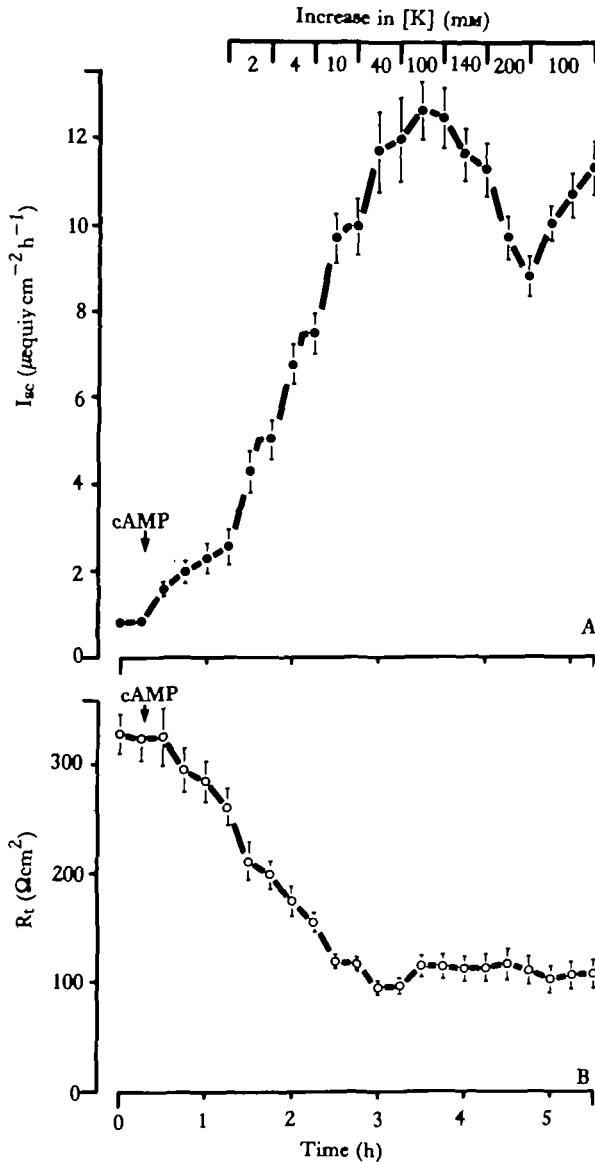

Fig. 5. Effects of stepwise bilateral K additions on (A)  $I_{\text{sc}}$  and (B)  $R_t$  under  $I_{\text{sc}}$  conditions. Recta were equilibrated in K-free saline for 4 h, then  $1 \text{ mM-cAMP}$  was added to the serosal side at the arrows. After 1 h exposure to cAMP, K-methylsulphate was added to both sides to give the final concentrations shown. The effects of stepwise bilateral Na additions on (C)  $I_{\text{sc}}$  and (D)  $R_t$  were determined as described for (A) and (B) except that Na-methylsulphate was added to both sides instead of K-methylsulphate. Means  $\pm$  s.e.;  $N = 9-10$  (K addition),  $N = 6$  (Na addition).

and ionic strength, Na-methylsulphate was added in parallel experiments under identical conditions (Fig. 5C,D). Na addition did not produce large step-like increases in  $I_{sc}$  (Fig. 5C). Also, high  $[Na]$  ( $>100$  mM) did not inhibit  $I_{sc}$ , in marked contrast to the effects of elevated K levels.  $R_t$  declined in a predictable manner when saline  $[Na]$  was increased above 10 mM (Fig. 5D), in contrast to the relatively constant  $R_t$  observed following K addition over the same concentration range (Fig. 5B).

The difference between mean  $I_{sc}$  obtained during Na and K additions was used as a measure of K-dependent Cl transport, since  $\Delta I_{sc}$  equals  $J_{net}^{Cl}$  at all K concentrations. Fig. 6 shows a Woolf plot of the K-dependent  $I_{sc}$  stimulation. A linear relationship was obtained between ( $[K]/K$ -dependent  $I_{sc}$ ) vs  $[K]$  when  $[K]$  was greater than 2 mM ( $r^2 = 0.9984$ ). The  $K_a$  was 3.2 mM-K and the maximum K-dependent  $I_{sc}$  was  $7.8 \mu\text{equiv cm}^{-2} \text{h}^{-1}$ .

The effect of 1 mM-cAMP on  $I_{sc}$  was also measured in two tissues when choline was the only monovalent cation added to the saline. After 3 h in the absence of both Na and K, cAMP increased  $I_{sc}$  by 4.0 and  $4.5 \mu\text{equiv cm}^{-2} \text{h}^{-1}$ , identical to values observed with 200 mM-Na present. Stimulations of this magnitude were also observed when both Na and K were replaced by tetramethyl ammonium (TMA). Cyclic AMP caused  $I_{sc}$  to increase from 1.33 to  $2.62 \mu\text{equiv cm}^{-2} \text{h}^{-1}$  and from 0.91 to  $2.66 \mu\text{equiv cm}^{-2} \text{h}^{-1}$  in two preparations exposed to choline saline lacking Na, K, Ca

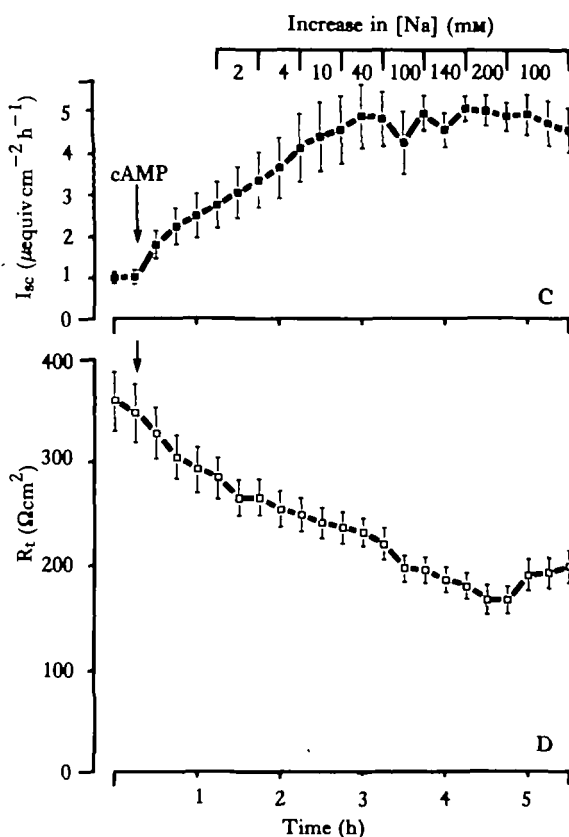

Figs 5C & D. For legend see p. 209.

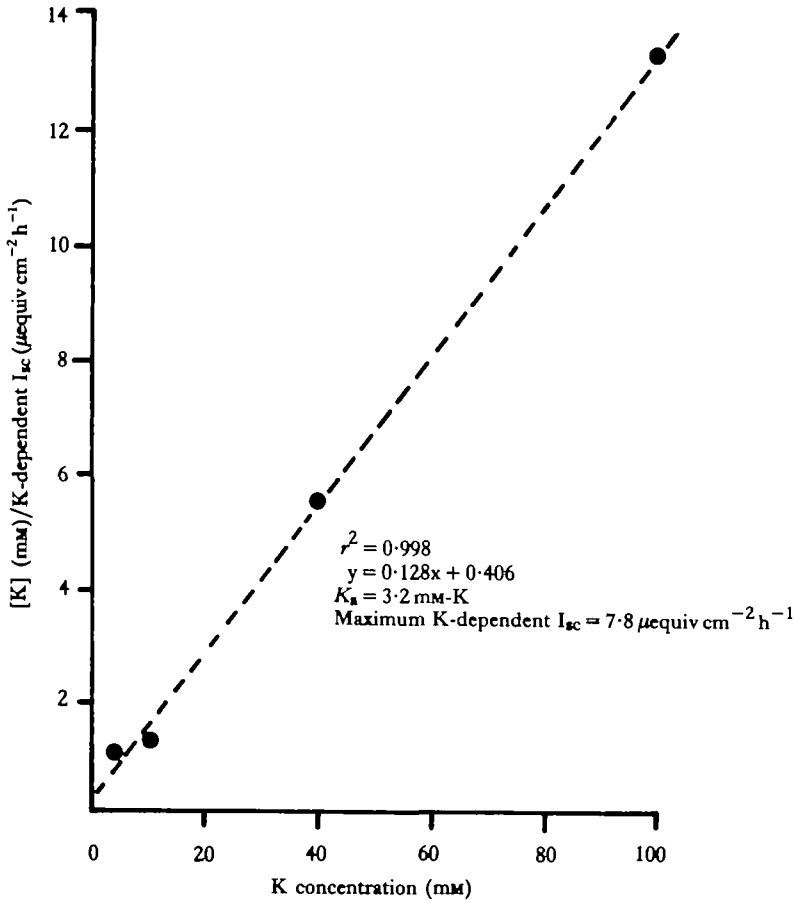

Fig. 6. Woolf plot of the relationship between external  $[K]$  and K-stimulated  $I_{sc}$ . Recta were exposed to 1 mM-cAMP on the serosal side throughout the experiment. External  $[Cl]$  was constant at 114 mM. The difference between  $I_{sc}$  in Fig. 5A and Fig. 5C was used to estimate K-stimulated Cl transport. The  $[K]$  producing half-stimulation of  $I_{sc}$  was 3.2 mM.

and Mg. This suggests that the K-independent component of cAMP-stimulated  $\Delta I_{sc}$  is either independent of these cations, or choline and TMA can substitute for them. In the next section we examine the relative ability of other cations to stimulate Cl transport.

#### *Selectivity of K stimulation of Cl transport*

Tissues were equilibrated for 2–4 h under  $I_{sc}$  conditions in K-free saline and then exposed to 1 mM-cAMP. After 2–3 h, various test cations were added bilaterally to a final concentration of 40 mM. Fig. 7 shows the selectivity sequence which was estimated by comparing the cation-stimulated  $I_{sc}$  after 1 h. Arranged in order of decreasing potency, the sequence was: 1.0 K > 0.58 Rb > 0.49 Cs > 0.08  $NH_4$  (and 0.2 Na from Fig. 5). The series K > Rb > Cs > Na is sequence I of Eisenman (1961), corresponding to a selectivity site having moderately weak field strength. This contrasts with the high selectivity of the Cl site described previously (Hanrahan & Phillips, 1980b).

*Sidedness of K stimulation*

$I_{sc}$  was measured during stepwise addition of K-methylsulphate to either the mucosal or serosal side to determine whether K 'activation' of Cl transport occurred specifically at one side of the epithelium. Recta were equilibrated under  $I_{sc}$  conditions in K-free saline for 3–4 h and then exposed to 1 mM-cAMP. After  $I_{sc}$  reached a new steady-state, aliquots of K-methylsulphate were added to the mucosal or serosal side (final concentration; 2–10 mM). Only low [K] was used in order to minimize the K diffusion current caused by a transepithelial K gradient, and to reduce contamination of the K-free side. To estimate K diffusion current, ' $I_{sc}$ ' was recorded during asymmetrical K additions when Cl transport was abolished by (i) adding 1 mM-azide to normal saline and stirring with  $N_2$ , and (ii) by replacing Cl with methylsulphate. Corrections for K diffusion ranged from 0–21 % in the presence of a 10 mM:0 mM (mucosa:serosa) gradient. The mean K diffusion currents measured in this way were subtracted from the  $I_{sc}$  measured in unpoisoned tissues in order to calculate true Cl-dependent  $I_{sc}$  with K gradients present.

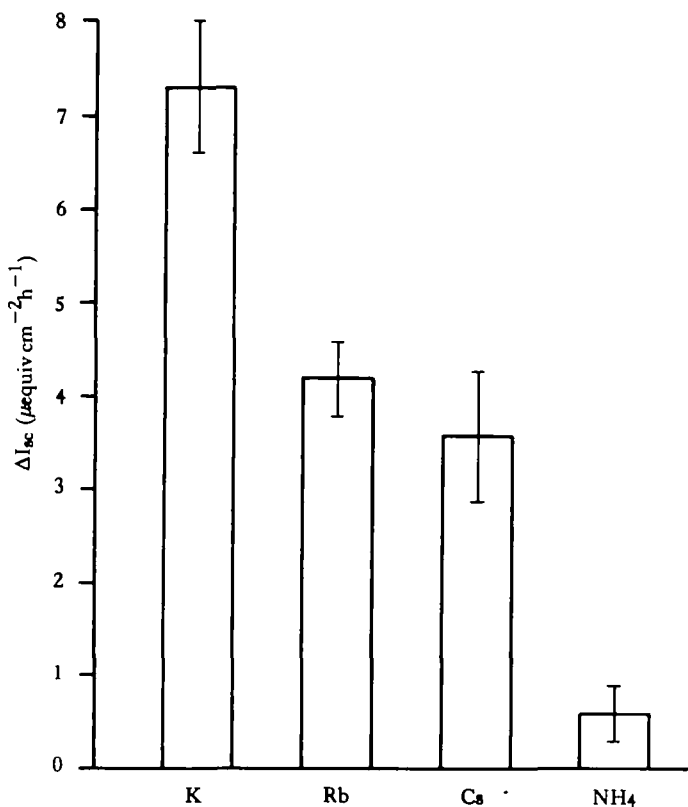

Fig. 7. Selectivity of cation stimulation of active Cl transport. Recta were equilibrated in K-free saline and exposed to 1 mM-cAMP on the serosal side for 1 h. After a steady-state was obtained, one of the above cations was added as sulphate salt to give a final test cation concentration of 40 mM.  $I_{sc}$  was measured after 90 min exposure. ( $\bar{x} \pm \text{s.e.}$ ;  $N = 5-6$ .)

Fig. 8 shows the effects of adding K-methylsulphate to one side of the epithelium. After corrections,  $I_{sc}$  attributable to active Cl transport increased from 1.55 to 6.85  $\mu\text{equiv cm}^{-2} \text{h}^{-1}$  when 10 mM-K was added to the mucosa. In contrast,  $I_{sc}$  was not changed significantly by serosal addition of K ( $P \gg 0.2$ ), suggesting that the K activation site is accessible only from the mucosal side.

#### Transepithelial $^{42}\text{K}$ fluxes under $I_{sc}$ conditions

##### Normal saline

Active K transport has been reported across locust rectum *in vivo* (Phillips, 1964*b,c*) and *in vitro* (Williams *et al.* 1978); however, the relative magnitudes of active and passive components are not known nor are the ionic requirements of K absorption. Considering the dependence of active Cl transport on external K, it was

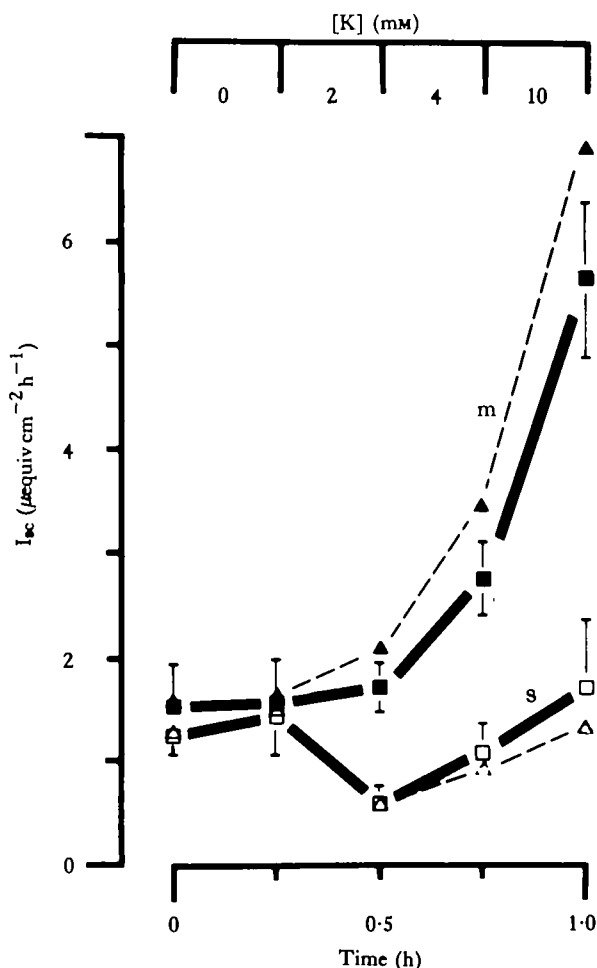

Fig. 8. Effect of adding K-methylsulphate stepwise to one side only on Cl-dependent  $I_{sc}$ . After equilibrating recta for 3 h under  $I_{sc}$  conditions in K-free saline, 1 mM-cAMP was added to the serosal side and  $I_{sc}$  was monitored. Aliquots of K-methylsulphate were then added to the mucosal (m) or serosal (s) chamber to give the concentrations indicated. Values were corrected for K diffusional current by subtracting the apparent  $\Delta I_{sc}$  produced by asymmetrical K addition in azide/ $\text{N}_2$  saline as described in the text. (Observed:  $\blacksquare, \blacksquare$ ; corrected  $\blacktriangle, \triangle$ .) Means  $\pm$  s.e.;  $N = 7$ .

of some interest to study the properties of active K transport, particularly the effects of cAMP, and to test the possibility that there are reciprocal ionic requirements for K and Cl absorption.

Fig. 9 shows the effects of 1 mM-cAMP on (a) unidirectional fluxes of  $^{42}\text{K}$  and (b)  $J_{\text{net}}^{\text{K}}$  across recta bathed in normal saline (114 mM-Cl, 10 mM-K).  $J_{\text{ms}}^{\text{K}}$  and  $J_{\text{sm}}^{\text{K}}$  increased from about  $0.35 \mu\text{equiv cm}^{-2} \text{h}^{-1}$  initially to 2.08 and  $1.56 \mu\text{equiv cm}^{-2} \text{h}^{-1}$  respectively after adding cAMP. A small but significant  $J_{\text{net}}^{\text{K}}$  was observed after 45 min of cAMP stimulation ( $0.63 \pm 0.26$ ;  $P < 0.05$ ) but it was less than 7% of the  $J_{\text{net}}^{\text{Cl}}$  measured under these conditions.

The four-fold stimulation of *both*  $J_{\text{ms}}^{\text{K}}$  and  $J_{\text{sm}}^{\text{K}}$  suggests that cAMP increases the

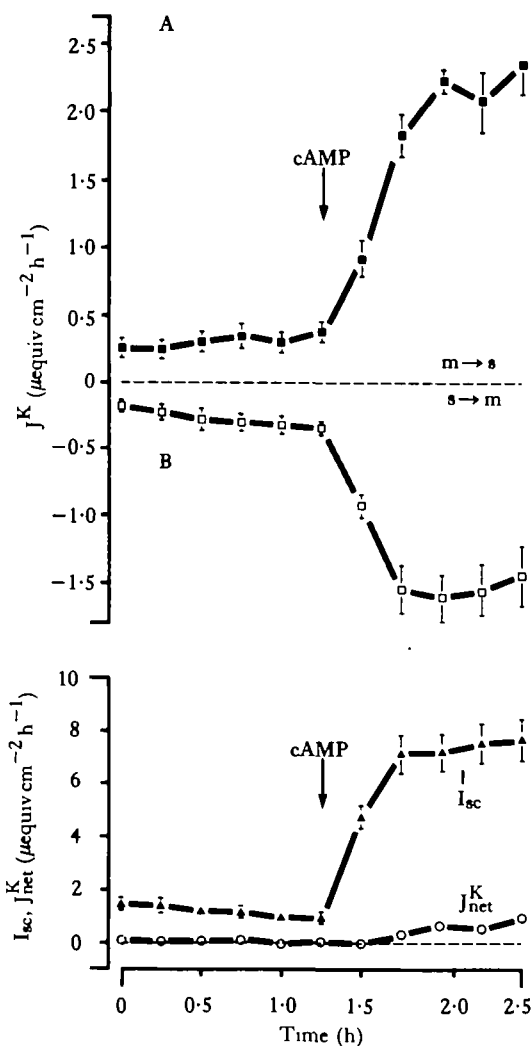

Fig. 9. Effects of cAMP on  $I_{\text{sc}}$  and K fluxes measured under  $I_{\text{sc}}$  conditions in normal saline (10 mM-K). (A)  $\blacksquare$ , unidirectional  $^{42}\text{K}$  flux from mucosa to serosa ( $m \rightarrow s$ ) and  $\square$  in the reverse direction ( $s \rightarrow m$ ); (B)  $\circ$ ,  $J_{\text{net}}^{\text{K}}$  and  $\blacktriangle$ ,  $I_{\text{sc}}$ . Tissues were pre-equilibrated for 4 h under  $I_{\text{sc}}$  conditions. Means  $\pm$  s.e.;  $N = 6$ ,  $J_{\text{ms}}^{\text{K}}$ ,  $J_{\text{sm}}^{\text{K}}$ ;  $N = 12$ ,  $I_{\text{sc}}$ ; s.e. for  $J_{\text{net}}^{\text{K}}$  is smaller than symbols (value in text).

apparent transepithelial K permeability ( $P_K = J_{sm}^K/[K]$ ) from  $0.98 \pm 0.14$  to  $4.0 \pm 0.62 \times 10^{-5} \text{ cm s}^{-1}$  ( $\bar{x} \pm \text{s.e.}$ ,  $N = 6$ ). This method of calculating permeability may lead to some error because it assumes that the tissue acts as a single barrier (Schultz & Frizzell, 1976) whereas  $^{42}\text{K}$  must penetrate two membrane barriers because the locust rectum is a tight epithelium (Hanrahan *et al.* 1982). This is discussed in a later section; however, the stimulations of *both* unidirectional fluxes do indicate that  $P_K$  increases during cAMP stimulation.

In summary, cAMP has two important effects on transepithelial K movements under  $I_{sc}$  conditions: (i) it produces a large (four-fold) increase in transepithelial K diffusion, and (ii) it induces a small active net K absorption.

#### Cl-free saline

Table 3A shows the effects of 1 mM-cAMP on  $^{42}\text{K}$  fluxes in Cl-free saline. After 1 h, both unidirectional fluxes increased by about 400%. The significance of  $J_{net}^K$  was marginal, using a conservative statistical criterion. When Cl was restored to normal levels on both sides (114 mM), there was no change in  $J_{sm}^K$  or  $J_{ms}^K$  (data not shown;  $P > 0.2$ , paired *t*-test), although  $I_{sc}$  increased six-fold to values typical of cAMP stimulation in normal saline ( $11.4 \pm 0.74 \mu\text{equiv cm}^{-2} \text{ h}^{-1}$ ;  $N = 12$ ).

These results show that neither the increased K permeability nor the small  $J_{net}^K$  produced by cAMP is affected by omitting Cl from the saline. In view of this independence, it seems unlikely that there is strict chemical coupling between Cl and K movements at either the apical or basal membrane. This conclusion is further supported by the finding that  $J_{net}^K$  is less than 8% of  $J_{net}^{Cl}$  under  $I_{sc}$  conditions (Fig. 9) and also by the previous observation that 35% of  $J_{net}^{Cl}$  is cation-independent.

#### $^{42}\text{K}$ fluxes in high-K saline

The apical membrane of this epithelium is usually bathed in K-rich (140 mM) Malpighian tubule fluid *in vivo*. The small  $J_{net}^K$  observed under  $I_{sc}$  conditions during cAMP stimulation (Fig. 9B) might result from the low concentration of K in the saline. Table 3B shows the effects of 1 mM-cAMP on  $^{42}\text{K}$  fluxes under  $I_{sc}$  conditions when recta were bathed bilaterally in high-K saline (140 mM-K, 50 mM-Cl). Unidirectional and net  $^{42}\text{K}$  fluxes were similar to those measured in normal saline containing only 10 mM-K (i.e. Fig. 9). As before,  $J_{net}^K$  increased to  $0.66 \mu\text{equiv cm}^{-2} \text{ h}^{-1}$  during cAMP exposure although this was not significant as judged by the overlap of 90% confidence intervals. Although  $J_{sm}^K$  increased steadily over the course of the experiment, addition of 1 mM-cAMP did not increase  $J_{sm}^K$  ( $P \gg 0.2$ , paired *t*-test), in marked contrast to the stimulation observed in normal saline.

Several characteristics of K transfer should be noted. First,  $J_{net}^K$  was  $0.6\text{--}0.8 \mu\text{equiv cm}^{-2} \text{ h}^{-1}$  under  $I_{sc}$  conditions whether saline [K] was 10 or 140 mM. This indicates that active K transport must saturate at low external levels of K ( $< 10$  mM). Second,  $P_K$  decreases several-fold at high [K] because  $J_{sm}^K$  does not increase proportionally when [K] is raised to high levels. This is shown by comparing  $J_{sm}^K$  in Fig. 9 and Table 3B.  $P_K$  is three- to four-fold higher when tissues are bathed in normal saline (10 mM-K, 114 mM-Cl) than in 'high-K' saline (140 mM-K, 50 mM-Cl). Although high-K saline contains less Cl than does normal saline, lower [Cl] could not explain the reduced  $P_K$  under high-K conditions, because  $P_K$  in Cl-free saline (with 10 mM-K)

Table 3. *Effects of cAMP on  $^{42}\text{K}$  fluxes and electrical parameters under  $I_{\text{sc}}$  conditions*

|                              | $I_{\text{sc}}$<br>( $\mu\text{equiv cm}^{-2} \text{ h}^{-1}$ ) | $J_{\text{ms}}^{\text{K}}$<br>( $\mu\text{equiv cm}^{-2} \text{ h}^{-1}$ ) | $J_{\text{sc}}^{\text{K}}$<br>( $\mu\text{equiv cm}^{-2} \text{ h}^{-1}$ ) | $J_{\text{net}}^{\text{K}}$<br>( $\mu\text{equiv cm}^{-2} \text{ h}^{-1}$ ) | $V_t$<br>(mV)    | $R_t$<br>( $\Omega\text{cm}^2$ ) |
|------------------------------|-----------------------------------------------------------------|----------------------------------------------------------------------------|----------------------------------------------------------------------------|-----------------------------------------------------------------------------|------------------|----------------------------------|
| * A Cl-free saline (10 mm-K) |                                                                 |                                                                            |                                                                            |                                                                             |                  |                                  |
| Control (unstimulated)       | $1.92 \pm 0.19$                                                 | $0.45 \pm 0.13$                                                            | $0.31 \pm 0.06$                                                            | $0.14 \pm 0.15$                                                             | $13.73 \pm 1.14$ | $285.1 \pm 14.0$                 |
| cAMP (60 min)                | $1.95 \pm 0.25$                                                 | $1.91 \pm 0.24$                                                            | $1.25 \pm 0.19$                                                            | $0.66 \pm 0.30$                                                             | $8.05 \pm 0.91$  | $161.3 \pm 5.8$                  |
| $\Delta$                     | $0.03 \pm 0.18$                                                 | $1.46 \pm 0.14$                                                            | $0.94 \pm 0.14$                                                            | 0.52                                                                        | $5.74 \pm 0.59$  | $123.8 \pm 13.15$                |
| $P$                          | $>0.2$                                                          | $<0.01$                                                                    | $<0.01$                                                                    | $0.05 < P < 0.1$                                                            | $< < 0.01$       | $< < 0.01$                       |
| B High-KCl saline (140 mm-K) |                                                                 |                                                                            |                                                                            |                                                                             |                  |                                  |
| Control (unstimulated)       | $2.93 \pm 0.30$                                                 | $1.37 \pm 0.21$                                                            | $1.36 \pm 0.22$                                                            | $0.01 \pm 0.30$                                                             | $15.93 \pm 1.61$ | $246.6 \pm 14.12$                |
| cAMP (60 min)                | $8.70 \pm 0.68$                                                 | $2.79 \pm 0.38$                                                            | $2.13 \pm 0.29$                                                            | $0.66 \pm 0.48$                                                             | $33.06 \pm 1.58$ | $138.0 \pm 10.45$                |
| $\Delta$                     | $5.77 \pm 0.58$                                                 | $1.42 \pm 0.28$                                                            | $0.77 \pm 0.37$                                                            | 0.65                                                                        | $17.13 \pm 1.67$ | $116.6 \pm 10.27$                |
| $P$                          | $< < 0.01$                                                      | $< 0.01$                                                                   | $> 0.2$                                                                    | $> 0.1$                                                                     | $< < 0.01$       | $< < 0.01$                       |

\* See comparable note in Table 2.  
 $N = 12$  for  $I_{\text{sc}}$ ,  $V_t$ ,  $R_t$ ;  $N = 6$  for  $J_{\text{ms}}^{\text{K}}$ ,  $J_{\text{sc}}^{\text{K}}$ .



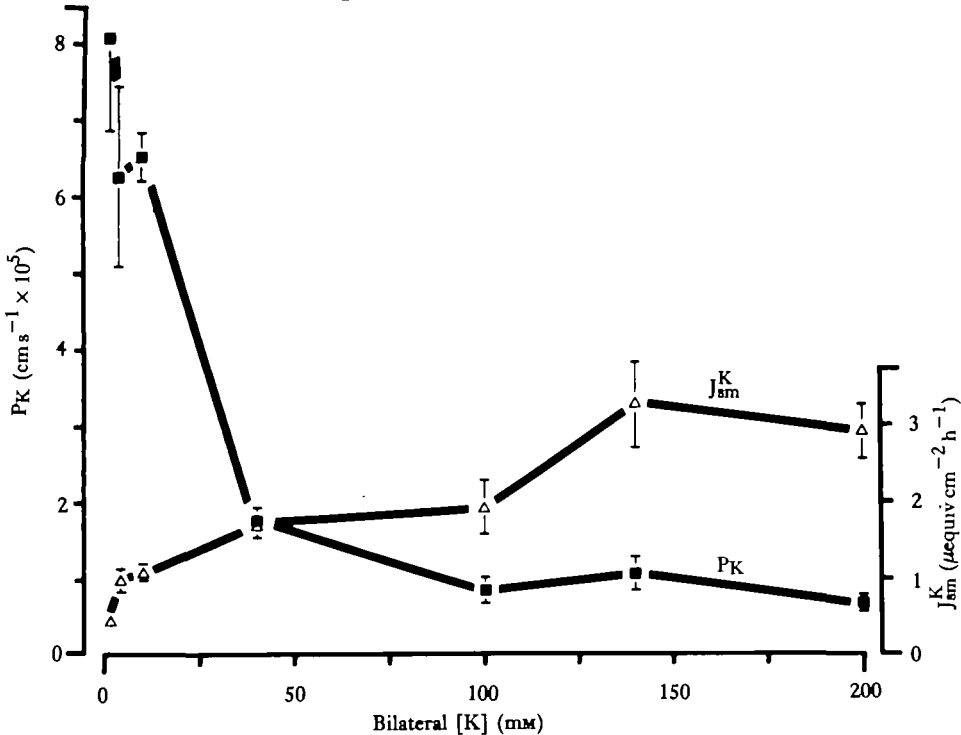

Fig. 10. K backflux measured under  $I_{sc}$  conditions and apparent transepithelial K permeability ( $P_K$ ) as a function of bilateral K concentration. Tissues were equilibrated in K-free saline and exposed to 1 mM-cAMP on the serosal side.  $J_{sm}^K$  was measured during two 15-min intervals; however, only the second flux period at each [K] was used in calculations. [K] was elevated by adding K-methylsulphate bilaterally under  $I_{sc}$  conditions to give the concentrations shown on the abscissa.  $P_K$  was calculated as described in text. Means  $\pm$  s.e.;  $N = 6$ .

is also four-fold higher than in high-K saline. Finally, cAMP does not increase  $P_K$  by four-fold in tissues bathed with high-K saline, in marked contrast to those bathed in normal or Cl-free salines containing only 10 mM-K. The simplest explanation for these results and the finding that  $R_t$  does not decrease when [K] is increased from 10 mM to 200 mM (Fig. 5B), is that K permeability declines at high external K concentrations.

Fig. 10 shows the concentration dependence of  $P_K$ . K-methylsulphate was added bilaterally to give concentrations between 2 and 200 mM.  $J_{sm}^K$  was measured during two 15-min flux intervals at each [K] and data from the second period were used in calculations of  $P_K$ .  $P_K$  declined from  $8 \times 10^{-5}$  to  $1 \times 10^{-5} \text{ cm s}^{-1}$  when K concentration of the saline was increased from 2 mM to >100 mM.

#### *Transepithelial $^{42}\text{K}$ fluxes under open-circuit conditions*

Chloride absorption across locust rectum is electrogenic and must, under open-circuit conditions, be matched by a similar flow of cations from mucosa to serosa or a flow of anions in the opposite direction. To determine whether K diffuses trans-epithelially to maintain electroneutrality during Cl transport, open-circuit  $^{42}\text{K}$  fluxes were measured sequentially under three different conditions; initially in normal saline

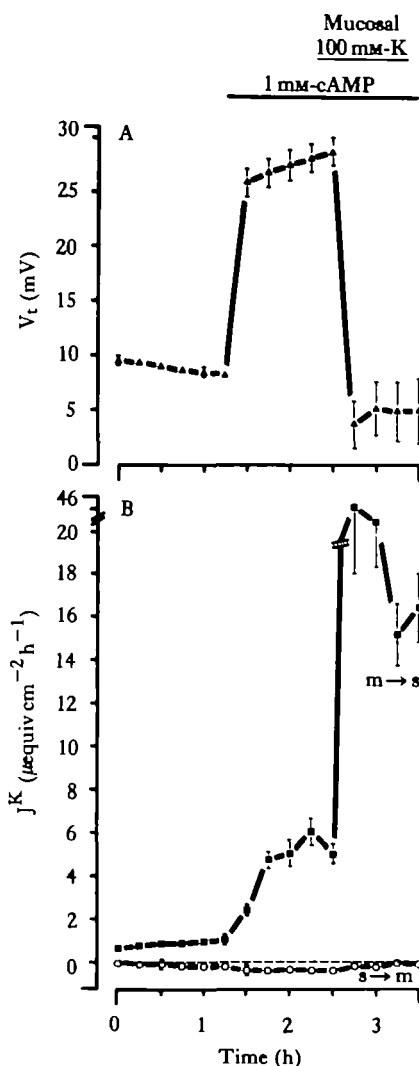

Fig. 11. Effects of sequential addition of 1 mM-cAMP to the serosal side and mucosal addition of  $\text{KCH}_3\text{SO}_4$  on (A)  $V_t$  and (B)  $^{42}\text{K}$  fluxes under open-circuit conditions. Recta were initially bathed in normal saline (10 mM-K, 110 mM-Na, 110 mM-Cl). Time zero was preceded by 4 h equilibration under open-circuit conditions. Means  $\pm$  s.e.;  $N = 16$ ,  $V_t$ ;  $N = 8$ ,  $J_{ms}^K$ ,  $J_{sm}^K$ .

(i.e. under control conditions), then during cAMP-stimulation (10 mM-K bilaterally), and finally, when mucosal [K] was raised to 100 mM in the presence of 1 mM-cAMP to mimic normal *in vivo* K gradients (10:1) across locust rectum.

$V_t$  ranged between 8–10 mV in normal saline (10 mM-K) before adding cAMP (Fig. 11A), in agreement with the previous results. Both forward and back fluxes of  $^{42}\text{K}$  were less than  $1 \mu\text{equiv cm}^{-2} \text{h}^{-1}$  (Fig. 11B). Serosal addition of cAMP (1 mM) increased  $V_t$  from 8 to 28 mV, enhanced  $J_{ms}^K$  by 500%, and produced a small but significant increase in  $J_{sm}^K$  ( $P < 0.01$ ). The resulting  $J_{net}^K$  ranged from 4.5 to 5.0  $\mu\text{equiv cm}^{-2} \text{h}^{-1}$ . It is noteworthy that  $J_{net}^{\text{Cl}}$  equalled  $J_{net}^K$  at open-circuit both before and after cAMP addition. This result indicates that K is the main counter-ion during active Cl transport even when the [Na] is 11-fold higher than [K] in the external saline (Hanrahan & Phillips, 1983).

The ratio of unidirectional  $^{42}\text{K}$  fluxes at open-circuit is higher in normal saline than

It predicted from the Ussing flux ratio equation. Under control conditions (normal saline, no cAMP) the  $^{42}\text{K}$  flux ratios were between 4 and 6, as compared to a predicted ratio of 1.4. It is unlikely that this discrepancy could result from active transport since no  $J_{\text{net}}^{\text{K}}$  was observed under  $I_{\text{sc}}$  conditions in the absence of cAMP (Fig. 10). An alternative explanation for high flux ratios is that transmural K movements are not independent. The flux ratio increased further after addition of cAMP (Fig. 11), which is consistent with the appearance of small  $J_{\text{net}}^{\text{K}}$  under  $I_{\text{sc}}$  conditions (Fig. 9). However, a step increase in mucosal [K] from 10 to 100 mM elevated the steady-state flux ratio to  $>100:1$ , rather than the predicted value of 10.4. This larger discrepancy is probably not due to enhanced active transport, since  $J_{\text{net}}^{\text{K}}$  is similar whether [K] is 10 mM or 140 mM, but it is again consistent with non-independence between transmural  $^{42}\text{K}$  fluxes, as has been shown in the basolateral membrane of the turtle colon (Kirk & Dawson, 1981). Increasing luminal [K] to 140 mM in the presence of cAMP to mimic the situation *in vivo* (Fig. 11) led to a large increase in  $J_{\text{net}}^{\text{K}}$  and corresponding dramatic decrease in the  $V_t$  opposing Cl transport.

#### DISCUSSION

The results in this paper suggest that K is required on the mucosal side of locust rectum for Cl to be actively transported at a maximal rate. Since this dependence is seen under  $I_{\text{sc}}$  conditions and  $I_{\text{sc}}$  equals  $J_{\text{net}}^{\text{Cl}}$ , K apparently does not stimulate transepithelial Cl absorption simply by acting as a counter-ion. Furthermore,  $J_{\text{ms}}^{\text{K}}$ ,  $J_{\text{sm}}^{\text{K}}$  and  $J_{\text{net}}^{\text{K}}$  are much smaller than  $J_{\text{net}}^{\text{Cl}}$  under  $I_{\text{sc}}$  conditions and are Cl-independent. We conclude that 80% of net K absorption under open-circuit conditions is electrically coupled to transepithelial Cl absorption (Hanrahan & Phillips, 1983). This would constitute a feedback loop because the concentration of potassium in the lumen would indirectly control passive K reabsorption by modulating the rate of electrogenic Cl transport.

#### *Effects of K on active Cl transport*

The relationship between steady-state  $J_{\text{net}}^{\text{Cl}}$  across locust rectum and external [Cl] is satisfactorily described by the Michaelis-Menten equation. K addition increases both  $K_t$  and  $J_{\text{max}}^{\text{Cl}}$ , but do these changes directly reflect the properties of the Cl 'pump'? The active step for transepithelial Cl absorption has been localized at the apical membrane using Cl-sensitive microelectrodes under identical conditions to those during  $^{36}\text{Cl}$  fluxes (Hanrahan & Phillips, 1980b, 1983). The net electrochemical gradient opposing Cl entry varies directly with changes in the rate of Cl transport following K addition, whereas the gradient favouring Cl exit across the basal membrane remains constant. These observations imply that the active entry step is rate-limiting and that steady-state flux kinetics will be largely determined by the apical membrane 'pump'.

Localized electrical coupling across the apical membrane might be the basis for the K-dependence of Cl transport; i.e. K might depolarize the apical membrane thereby reducing the electrochemical potential against which the Cl pump must work, and such a mechanism might not be obvious from measurements of transepithelial fluxes.

However, in order to explain the 10-fold difference between  $J_{\text{net}}^{\text{Cl}}$  and  $J_{\text{net}}^{\text{K}}$  under  $I_{\text{sc}}$

conditions, tight electrical coupling during Cl entry across the apical membrane would require a very large active return of K from cell to mucosal side (i.e. recycling), because the net electrochemical gradient for K across the apical membrane as measured using ion-sensitive microelectrodes is 0 mV under  $I_{sc}$  conditions (Hanrahan, 1982). K secretion has not been observed across this tissue under the wide variety of conditions investigated.

KCl co-entry at a rate equal to the rate of K-dependent Cl transport would contribute significantly to  $P_K$ . The observation that  $P_K$  is not changed by Cl removal argues against chemical coupling between potassium and chloride. Moreover, when equivalent electromotive forces (e.m.f.) across the apical ( $E_a$ ) and basal ( $E_b$ ) membranes were calculated under open-circuit conditions using membrane potentials and resistances obtained by flat-sheet cable analysis (Hanrahan, 1982),  $E_a$  and  $E_b$  were  $-55.7$  and  $-52.5$  mV before adding cAMP, and  $-67.9$  and  $-39.9$  mV after adding cAMP (cell negative). This increase in apical membrane e.m.f. could be explained by an electrogenic Cl pump, but not by a model which involves parallel electroneutral KCl co-entry and K back-diffusion to the mucosal side, because the measured K gradient would generate an e.m.f. of 12.4 mV in the wrong direction under those conditions.

The simplest model for K stimulation of active Cl transport, consistent with all our data, is one in which K enhances active Cl entry in a manner analogous with enzyme activation. This model might also apply to other insect epithelia where K-stimulated Cl transport has been reported (Cooper, Eaton & Jungreis, 1980).

The K-insensitive component of cAMP-stimulated  $J_{net}^{Cl}$  observed in Fig. 5C may result from a single population of Cl pump sites functioning at a low rate under K-free conditions and capable of a graded response to K. Alternatively, two populations of Cl pump sites may exist; one which operates without K and another which is only functional when  $[K]$  is elevated.

#### *Passive K transport*

$J_{net}^K$  is largely passive under open-circuit conditions and electrically coupled to active Cl transport. In support of this view,  $J_{net}^K$  is only 8 % of  $J_{net}^{Cl}$  when locust rectum is short-circuited whereas  $J_{net}^K$  equals  $J_{net}^{Cl}$  under open-circuit conditions. K acts as the counter-ion for electrogenic Cl transport even when much higher concentrations of Na are present in the mucosal solution (114 mM-Na vs 10 mM-K). The predominance of K as the counter-ion is ensured *in vivo* because (i) natural K levels (140 mM) are much higher than Na levels (20–40 mM) in the rectal lumen, and (ii) cAMP (which mediates the actions of CTSH) elevates  $P_K$  by about 400 %. In contrast,  $P_{Na}$  is unaffected by cAMP (Spring & Phillips, 1980).

When K was added to the mucosal side under open-circuit conditions to mimic the *in vivo* K gradient, we expected the mucosal side to become negative with respect to the serosal side (despite the stimulatory effect of K on active Cl transport), because epithelial K conductance is normally high. However, no reversal of  $V_t$  was observed when mucosal  $[K]$  was elevated to 140 mM. Also,  $R_t$  did not change when  $[K]$  was elevated from 10 to 200 mM. Both these observations are explained if  $P_K$  declined as  $[K]$  was increased. This decline in permeability was confirmed by measuring  $^{42}K$  backflux as a function of bilateral  $[K]$  under  $I_{sc}$  conditions. The exact mechanism

its concentration-dependence has not been studied in detail, but it may be analogous to the inverse relationship between mucosal  $[Na]$  and the rate of Na entry at the apical membrane reported in frog skin [Biber & Curran, 1970; Fuchs, Hviid Larsen & Lindemann, 1977; Moreno *et al.* 1973; Rick *et al.* 1975; Rotunno, Vilallongs, Fernandez & Cereijido, 1970; Van Driessche & Lindemann, 1979).

Calculating  $P_K$  from  $J_{sm}^K$  under  $I_{sc}$  conditions might result in an over-estimate of transepithelial permeability because it assumes that the epithelium is a single barrier to tracers when in fact  $P_K$  depends on membrane potentials and intracellular and extracellular K activities (Schultz & Frizzell, 1976). Intracellular potential has been measured under  $I_{sc}$  conditions as a function of external potassium concentration (Hanrahan, 1982). Using equation 14 of Schultz & Frizzell (1976), we calculated that 40 % of the apparent decline in K permeability is due to membrane depolarizations and changes in intracellular K activity, but the remaining 60 % of the decline in  $P_K$  must be due to a real reduction in K permeability. Also, errors due to the simplifying assumptions used in calculating  $P_K$  do not explain why cAMP stimulates  $J_{sm}^K$  by four-fold in normal saline (10 mM-K; Fig. 9) but not in high-K saline (140 mM-K; Table 3).

Hormonal regulation of salt reabsorption in locust rectum appears to be highly efficient because electrogenic Cl transport and counter-ion permeability ( $P_K$ ) are stimulated simultaneously. What advantages might arise from a K-inhibitable  $P_K$ ? When the hindgut contains unmodified (high-K) Malpighian tubule fluid, a K-sensitive  $P_K$  would prevent  $V_t$  from reversing to negative values and drawing Na from the haemolymph into the gut lumen. The maximum transepithelial electrochemical gradient for Na developed across the rectum *in situ* is smaller than for Cl or K (Phillips, 1964*b,c*), and active Na transport during cAMP stimulation is weak compared to Cl absorption (20 %; Spring & Phillips, 1980; Williams *et al.* 1978). Reducing the loss of Na in this manner may be important for an insect feeding on fresh plant matter that is low in Na (14 mM) compared to K (114 mM-lettuce; Hanrahan, 1982). Finally, salt-loaded locusts can produce a strongly hypertonic urine in order to conserve body water (Phillips, 1964*a,b,c*). A decline in potassium permeability might prevent excess K reabsorption under these conditions.

#### *Properties of active K transport*

Net flux of  $^{42}K$  from mucosa-to-serosa was measured under  $I_{sc}$  conditions during cAMP stimulation. The presence of a small active absorption of K is consistent with earlier findings that K is maintained far below electrochemical equilibrium in recta of salt-depleted (hydrated) locusts (Phillips, 1964*b,c*). In the present study, there was no net flux of K until cAMP was added. This differs from the very low rate of K absorption observed by Williams *et al.* (1978) using a different saline (Berridge, 1966) and a voltage clamp which did not correct for series resistance. We did not measure the  $K_t$  of active K absorption in this study; however, it is presumably less than 10 mM-K since  $J_{net}^K$  was identical when the bathing saline contained either 10 or 140 mM-K. This high-affinity, low capacity system for K absorption could be responsible for reducing  $[K]$  in the rectal fluid to the low levels reported in salt-depleted locusts (0.5 mM; Phillips, 1964*c*). In summary, K is absorbed transepithelially by electrical coupling to Cl transport under open-circuit conditions and also by an active system

which transports at a low rate but with a high affinity for K. The fact that there was no reduction in the cAMP-stimulated  $J_{\text{net}}^{\text{K}}$  when Cl was omitted from the saline supports the notion that KCl co-transport is not involved in transepithelial K absorption.

This work was supported by NSERC, Canada.

#### REFERENCES

- AHEARN, G. A. (1978). Allosteric cotransport of sodium, chloride, and calcium by the intestine of freshwater prawns. *J. Membrane Biol.* **42**, 281–300.
- BERRIDGE, M. J. (1966). Metabolic pathways of isolated Malpighian tubules of the blowfly functioning in an artificial medium. *J. Insect Physiol.* **12**, 1523–1538.
- BIBER, T. U. L. & CURRAN, P. F. (1970). Direct measurement of uptake of sodium at the outer surface of the frog skin. *J. gen. Physiol.* **56**, 83–99.
- BLUNK, M. & MOMMSEN, T. P. (1978). Systematic errors in fitting linear transformations of the Michaelis-Menten equation. *Biometrika* **65**, 363–368.
- BRADLEY, T. J. & PHILLIPS, J. E. (1977). The location and mechanism of hyperosmotic fluid secretion in the rectum of the saline-water mosquito larvae *Aedes taeniorhynchus*. *J. exp. Biol.* **66**, 111–126.
- COOPER, P. D., EATON, L. E. & JUNGREIS, A. M. (1980). Chloride transport during reabsorption of molting fluid across the pharate pupal integument of tobacco hornworm, *Manduca sexta*. *J. gen. Physiol.* **76**, 13a–14a.
- EISENMAN, G. (1961). On the elementary atomic origin of equilibrium ionic specificity. In *Symposium of Membrane Transport and Metabolism*, (eds A. Kleinzeller & A. Kotyk), pp. 163–179. New York: Academic Press.
- FUCHS, W., HVIID LARSEN, E. & LINDEMANN, B. (1977). Current-voltage curve of sodium channels and concentration dependence of sodium permeability in frog skin. *J. Physiol., Lond.* **267**, 137–166.
- HALDANE, J. B. S. (1957). Graphical methods in enzyme chemistry. *Nature, Lond.* **179**, 832.
- HANRAHAN, J. W. (1982). Cellular mechanism and regulation of KCl transport across an insect epithelium. Ph.D. thesis, University of British Columbia, Vancouver, B.C., Canada.
- HANRAHAN, J. W. & PHILLIPS, J. E. (1980a).  $\text{Na}^+$ -independent  $\text{Cl}^-$  transport in an insect. *Fedn Proc. Fedn Am. Soc. exp. Biol.* **39**, 285.
- HANRAHAN, J. W. & PHILLIPS, J. E. (1980b). Characterization of locust  $\text{Cl}^-$  transport. *Am. Zool.* **20**, 938.
- HANRAHAN, J. W. & PHILLIPS, J. E. (1982). Electrogenic,  $\text{K}^+$ -dependent chloride transport in locust hindgut. *Phil. Trans. R. Soc. Ser. B* **299**, 585–595.
- HANRAHAN, J. W. & PHILLIPS, J. E. (1983). Mechanism and control of salt absorption in locust rectum. *Am. J. Physiol.* **244**, R131–R142.
- HANRAHAN, J. W., MEREDITH, J., PHILLIPS, J. E. & BRANDYS, D. (1983). Methods for the study of transport and control in insect hindgut. In *Methods for the Study of Insect Epithelia*, (eds T. Bradley & T. Miller), pp. 19–67. New York: Springer-Verlag.
- HANRAHAN, J. W., PHILLIPS, J. E. & STEEVES, J. D. (1982). Electrophysiology of Cl transport across insect rectum: effects of cAMP. *Fedn Proc. Fedn Am. Soc. exp. Biol.* **41**, 1496.
- KIRK, K. L. & DAWSON, D. C. (1981). Basolateral potassium channel in turtle colon: interaction of permeating ions. *Fedn Proc. Fedn Am. Soc. exp. Biol.* **40**, 357.
- MORENO, J. H., REISIN, I. L., RODRIGUES-BOULAN, E., ROTUNNO, C. A. & CEREJIDO, M. (1973). Barriers to sodium movements across frog skin. *J. Membrane Biol.* **11**, 99–115.
- PHILLIPS, J. E. (1964a). Rectal absorption in the desert locust, *Schistocerca gregaria* Förskal. I. Water. *J. exp. Biol.* **41**, 15–38.
- PHILLIPS, J. E. (1964b). Rectal absorption in the desert locust, *Schistocerca gregaria* Förskal. II. Sodium, potassium and chloride. *J. exp. Biol.* **41**, 39–67.
- PHILLIPS, J. E. (1964c). Rectal absorption in the desert locust, *Schistocerca gregaria* Förskal. III. The nature of the excretory process. *J. exp. Biol.* **41**, 69–80.
- PHILLIPS, J. E. (1970). Apparent transport of water by insect excretory systems. *Am. Zool.* **10**, 413–436.
- PHILLIPS, J. E. (1981). Comparative physiology of insect renal function. *Am. J. Physiol.* **241**, R241–R257.
- PHILLIPS, J. E., BRADLEY, T. J. & MADDRELL, S. H. P. (1978). Mechanisms of ionic and osmotic regulation in saline-water mosquito larvae. In *Comparative Physiology: Water and Fluid Mechanisms*, (eds K. Schmidt-Nielsen, L. Bolis & S. H. P. Maddrell), pp. 151–171. Cambridge: Cambridge University Press.
- RICK, R. A., DÖRGE, E. & NAGEL, W. (1975). Influx and efflux of sodium at the outer surface of frog skin. *J. Membrane Biol.* **22**, 183–196.
- ROTHER, C. F., QUAY, J. F. & ARMSTRONG, W. M. (1969). Measurement of epithelial electrical characteristics with an automatic voltage clamp device with compensation for solution resistance. *I.E.E.E. Trans. Biol-Med. Engin.* **BME-16**(2), 160–169.
- ROTUNNO, C. A., VILALLONGS, F. A., FERNANDEZ, M. & CEREJIDO, M. (1970). The penetration of sodium into the epithelium of the frog skin. *J. gen. Physiol.* **55**, 716–735.

- MULTZ, S. G. & FRIZZELL, R. A. (1976). Ionic permeability of epithelial tissues. *Biochim. biophys. Acta* **443**, 181–189.
- SEGEL, I. H. (1975). *Enzyme Kinetics: Behaviour and Analysis of Rapid Equilibrium and Steady-state Enzyme Systems*. Toronto: Wiley-Interscience, John Wiley & Sons. 371p.
- SPRING, J. H. & PHILLIPS, J. E. (1980). Studies on locust rectum. II. Identification of specific processes regulated by corpora cardiaca and cyclic-AMP. *J. exp. Biol.* **86**, 225–236.
- VAN DRIESSCHE, W. & LINDEMANN, B. (1979). Concentration dependence of currents through single sodium-selective pores in frog skin. *Nature, Lond.* **282**, 519–520.
- WILLIAMS, D., PHILLIPS, J. E., PRINCE, W. & MEREDITH, J. (1978). The source of short-circuit current across locust rectum. *J. exp. Biol.* **77**, 107–122.
